# Supplementary material for: Rinf Regulates Pluripotency Network Genes and Tet Enzymes in Embryonic Stem Cells
Source: PubMed Central journal article supplement — Cell Rep. Author manuscript; Available in PMC 2019 Aug 30. (PMC6716522; doi:10.1016/j.celrep.2019.07.080), 2019-08-20
Supplement: NIHMS1538191-supplement-1.pdf [file NIHMS1538191-supplement-1.pdf]

**Cell Reports, Volume 28**

**Supplemental Information**

**Rinf Regulates Pluripotency Network Genes  
and Tet Enzymes in Embryonic Stem Cells**

**Mirunalini Ravichandran, Run Lei, Qin Tang, Yilin Zhao, Joun Lee, Liyang Ma, Stephanie Chrysanthou, Benjamin M. Lorton, Ales Cvekl, David Shechter, Deyou Zheng, and Meelad M. Dawlaty**

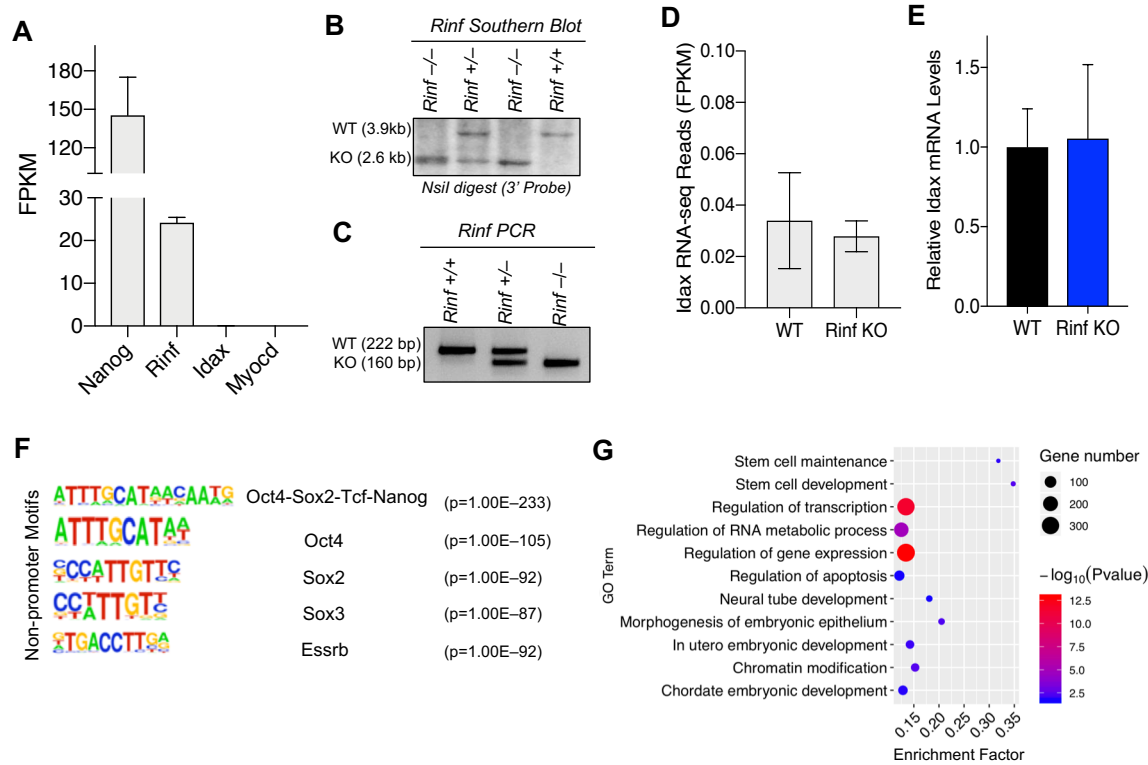

### Figure S1 (Related to Figure 1): Expression and chromatin enrichment of *Rinf* in ESCs.

- (A) RNA-seq read counts for indicated genes in ESCs. Note the absence of *Idax* transcripts in contrast to *Rinf* transcripts in ESCs. *Nanog* and *Myocd* are used as expressed and unexpressed gene controls in ESCs, respectively. Error bars = Stdev.
- (B) Genotype confirmation of targeted ESCs by southern blot.
- (C) Genotype confirmation of targeted ESCs by PCR.
- (D) *Idax* RNA-seq read counts in ESCs of indicated genotypes. Note the very low FPKM values for *Idax* in both wild type and *Rinf* KO ESC. Error bars = Stdev.
- (E) Quantification of *Idax* mRNA by RT-qPCR in wild type and *Rinf*<sup>-/-</sup> ESCs. Note that this is relative expression. *Idax* CT values were >33-34 for both WT and KO ESCs (no detectable transcript levels). Data normalized to *Gapdh*. Error bars = Stdev.
- (F) Motif analysis of *Rinf* peaks revealing enrichment for pluripotency factor binding sites.
- (G) Gene ontology analysis of *Rinf* bound genes.

Figure S2

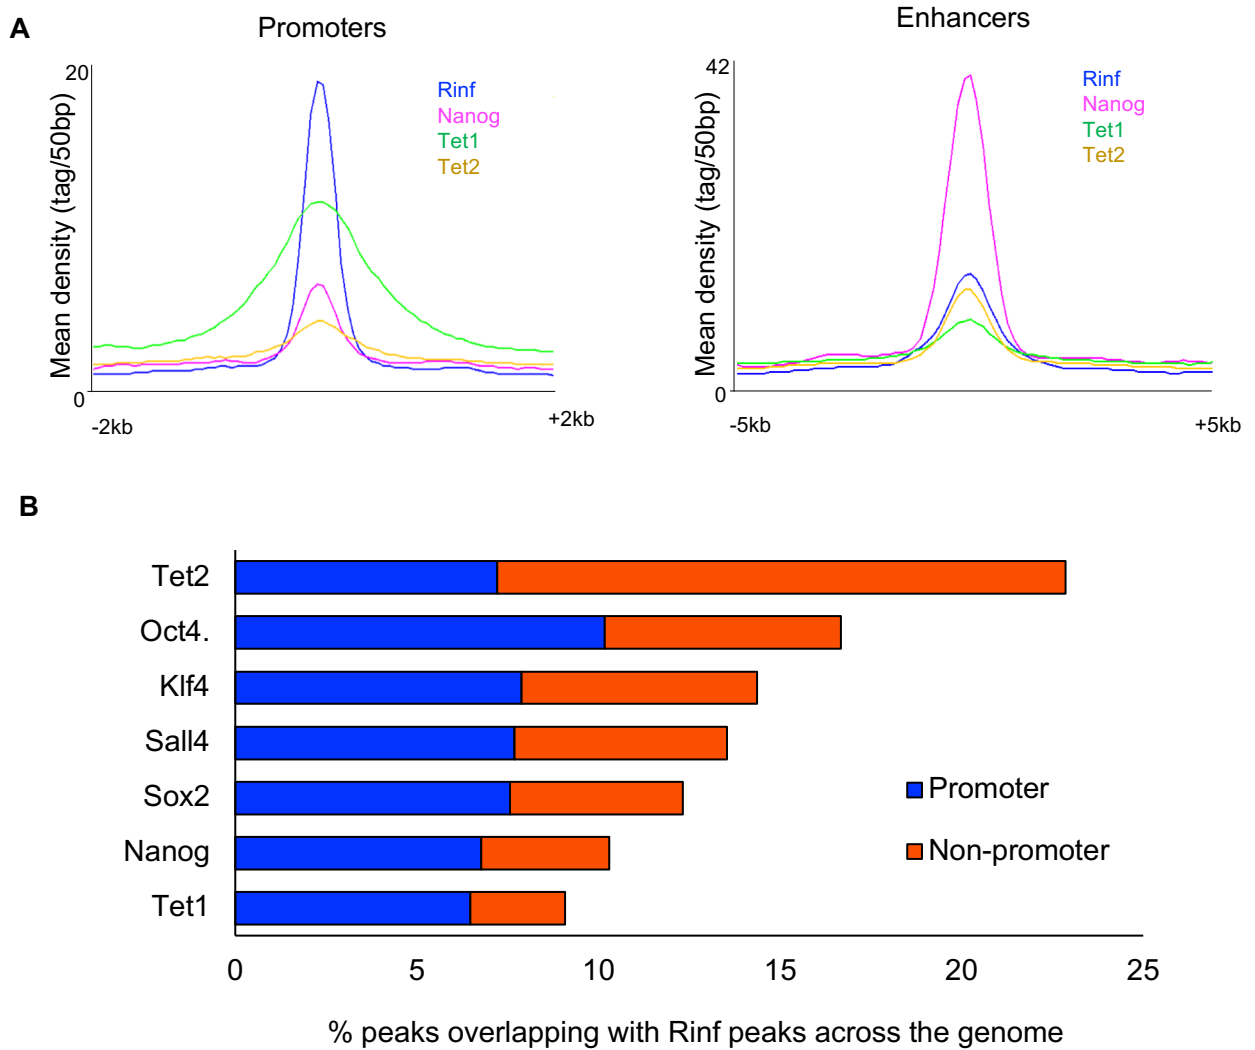

**Figure S2 (Related to Figure 2): Co-occupancy of Rinf with pluripotency factors and Tet enzymes at gene regulatory elements**

(A) ChIP-seq read densities at Rinf peaks presented as line graphs. The peaks are separated into those at promoters and enhancers. Centers are summit of Rinf peak.

(B) Fraction of pluripotency factor and Tet peaks that overlap with Rinf peaks at promoters and enhancers in ESCs.

A

| Sample | Total reads | Trim galore | Align<br>(concordant pairs) |
|--------|-------------|-------------|-----------------------------|
| WT-1   | 24089091    | 23973542    | 69.0%                       |
| WT-2   | 31096282    | 30969961    | 68.3%                       |
| KO-1   | 26947054    | 26844267    | 67.0%                       |
| KO-2   | 26331870    | 26195040    | 67.3%                       |

B

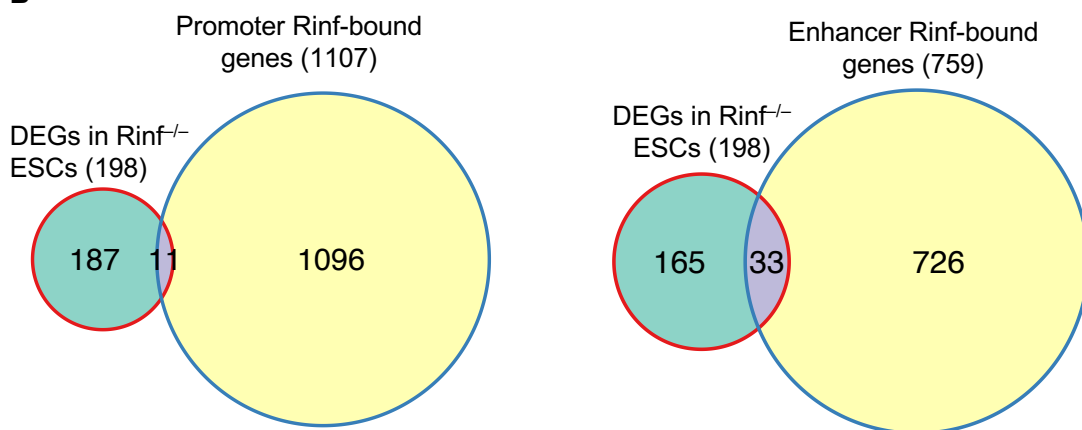

**Figure S3 (Related to Figure 3): Gene expression analysis of *Rinf* deficient ESCs by RNA-seq.**

(A) Summary table of number of RNA-seq reads in ESCs.

(B) Overlap of differentially expressed genes (DEGs) in *Rinf*-KO ESCs with *Rinf* bound genes in ESCs

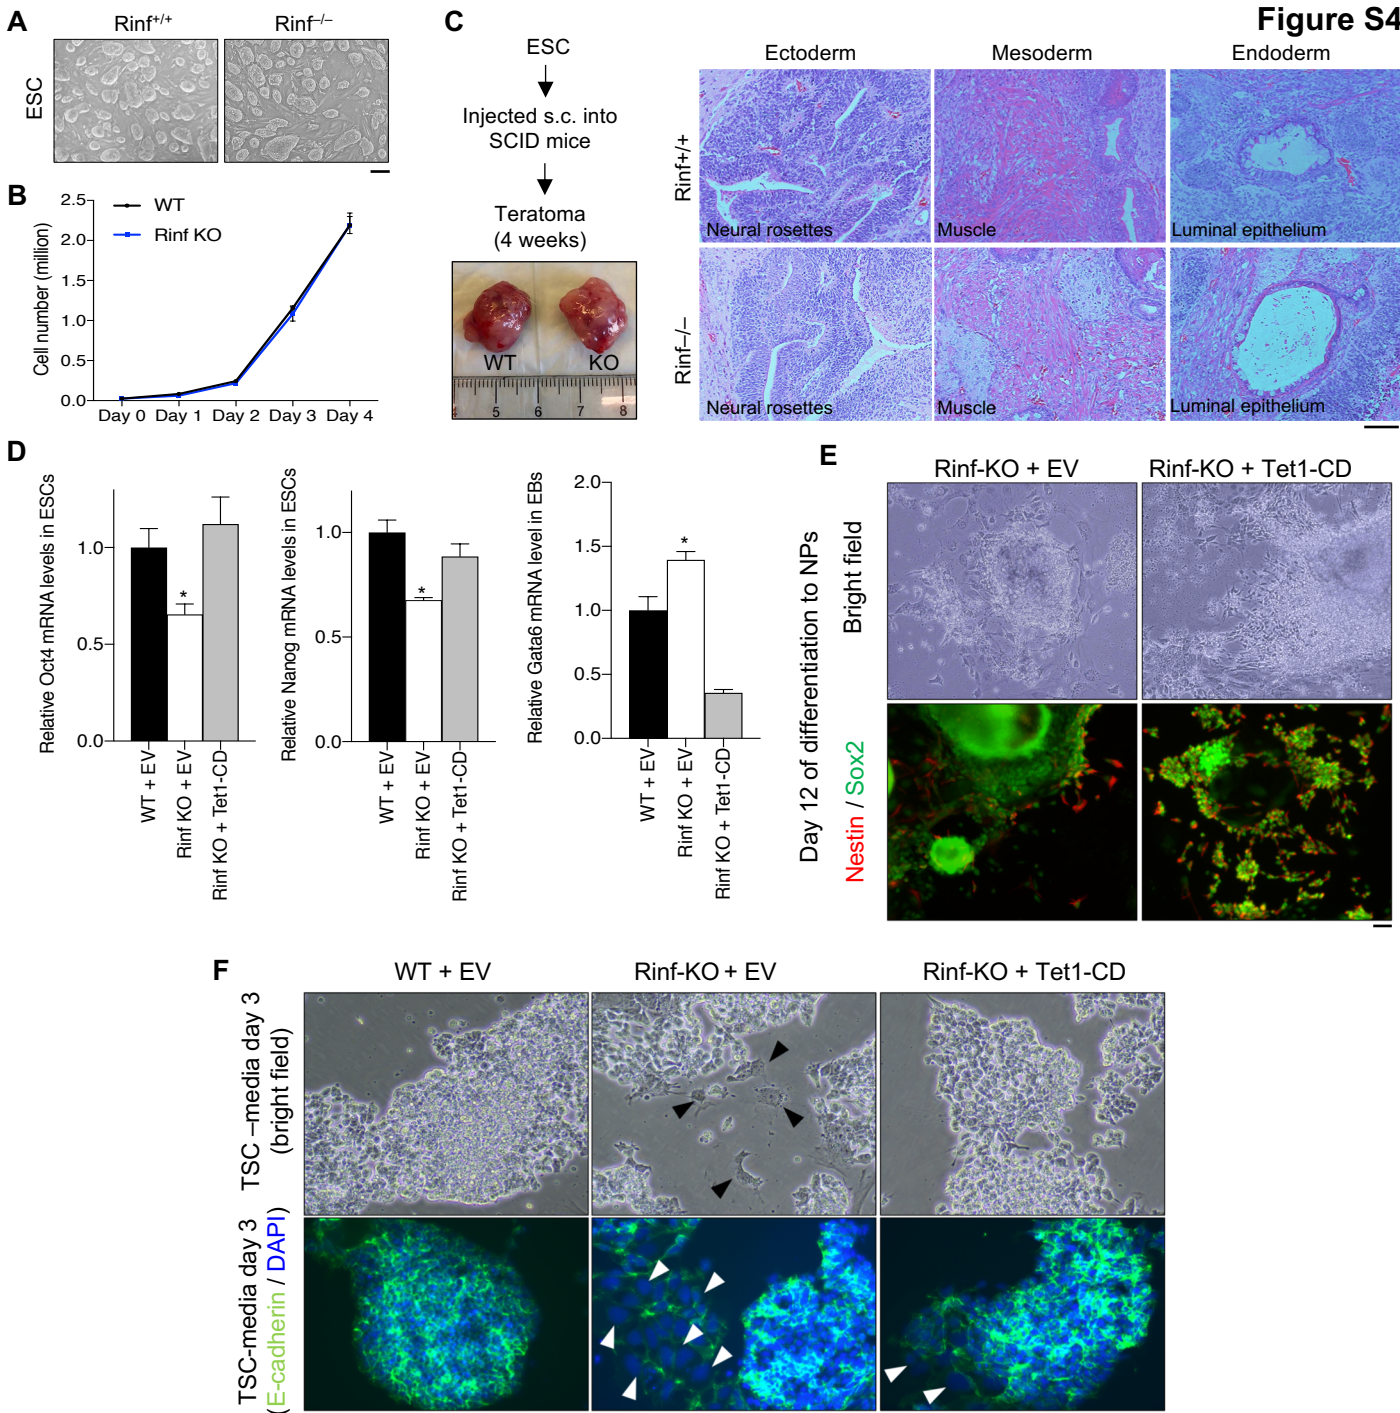

**Figure S4 (Related to Figure 4): Characterization of wild type and *Rinf*<sup>-/-</sup> ESCs**

(A) Brightfield images of ESCs of indicated genotypes. Bar = 200  $\mu$ m

(B) Proliferation rate of ESCs. Cell count of 3 lines of each genotype plotted. Error bars = stdev.

(C) Gross images of teratomas (left) and histological analysis of teratomas by H&E staining (right). Bar = 100  $\mu$ m

(D) Quantification of mRNA levels of indicated genes in ESCs or EBs of indicated genotypes. Data normalized to Gapdh. Error bars = Stdev. \* Statistically significant ( $p < 0.05$ ).

(E) Bright field and immunofluorescence images of ESCs at day 12 of differentiation to neural progenitors (NPs). Note the improved differentiation of Rinf KO ESCs that express Tet1 catalytic domain (Tet1-CD). Bar = 50  $\mu$ m

(F) Bright field and immunofluorescence images of ESCs cultured in Trophoblast stem cell media (TSC) for three days. Trophoblast giant cells are marked by flat morphology (black arrowheads) as well as negative E-cadherin staining and large nuclei (white arrowheads). Note that expression of Tet1 catalytic domain (Tet1-CD) in Rinf KO ESCs reduces skewed differentiation towards trophoctoderm lineage. Bar = 50  $\mu$ m

**Table S1 (Related to STAR Methods): List of oligos used in study**

| Name                      | Sequence (5'-3')          | Purpose        | Source                                  |
|---------------------------|---------------------------|----------------|-----------------------------------------|
| Rinf gRNA Left For oligo  | GTAATGCCTCATCAGACGTC      | Gene targeting | This paper                              |
| Rinf gRNA Left Rev oligo  | GACGTCTGATGAGGCATTAC      | Gene targeting | This paper                              |
| Rinf gRNA Right For oligo | GCCAGCAAGCCATGGTTTGC      | Gene targeting | This paper                              |
| Rinf gRNA Right Rev oligo | GCAAACCATGGCTTGCTGGC      | Gene targeting | This paper                              |
| V5-Rinf gRNA oligo For    | GCCACCGCCGAGGCTCGACA      | Gene Targeting | This paper                              |
| V5-Rinf gRNA oligo Rev    | TGTCGAGCCTCGGCGGTGGC      | Gene Targeting | This paper                              |
| Rinf genotyping For       | CGTGCTACACGCTCAACTCT      | Genotyping     | This paper                              |
| Rinf genotyping Rev       | TGTTACTGCTGCTGCTACTGC     | Genotyping     | This paper                              |
| Rinf RT-qPCR For          | CAGCTCAGGCAAGAAGAACG      | Real time qPCR | This paper                              |
| Rinf RT-qPCR Rev          | GACGGAAGCATCACCTTCTC      | Real time qPCR | This paper                              |
| Idax RT-qPCR For          | CACTTCGCTAGAGAGAACACC     | Real time qPCR | This paper                              |
| Idax RT-qPCR Rev          | CTGGCCAATTCCTCCAAACTTC    | Real time qPCR | This paper                              |
| Tet1 RT-qPCR For          | TGCACCTACTGCAAGATCG       | Real time qPCR | Dawlaty et al. Cell Stem Cell 2011      |
| Tet1 RT-qPCR Rev          | AAATTGGCATCACAGCTTCC      | Real time qPCR | Dawlaty et al. Cell Stem Cell 2011      |
| Tet2 RT-qPCR For          | GTCACACAGGACATGATCCAGGAG  | Real time qPCR | Zhe et al., Blood 2011                  |
| Tet2 RT-qPCR Rev          | CCTGTTCCATCAGGCTTGCT      | Real time qPCR | Zhe et al., Blood 2011                  |
| Tet3 RT-qPCR For          | TCCGATTGAGAAGTCACTC       | Real time qPCR | Dawlaty et al. Developmental Cell 2014  |
| Tet3 RT-qPCR Rev          | CCAGGCCAGGATCAAGATAA      | Real time qPCR | Dawlaty et al. Developmental Cell 2014  |
| Dnm13a RT-qPCR For        | GACTCGCGTGAATAACCTTAG     | Real time qPCR | Yamaji et al., Cell Stem Cell 2013      |
| Dnm13a RT-qPCR Rev        | GGTCACTTCCCTCACTCTGG      | Real time qPCR | Yamaji et al., Cell Stem Cell 2013      |
| Dnm13b RT-qPCR For        | CTCGCAAGGTGTGGGTTTTGTAAC  | Real time qPCR | Yamaji et al., Cell Stem Cell 2013      |
| Dnm13b RT-qPCR Rev        | CTGGGCATCTGTCACTTTTGCAACC | Real time qPCR | Yamaji et al., Cell Stem Cell 2013      |
| Dnm13l RT-qPCR For        | GCTCTAAGACCCTTGAACCTTG    | Real time qPCR | Litman et al., Nat Struct Mol Biol 2008 |
| Dnm13l RT-qPCR Rev        | GCTGGTTCACCTTTGACTCTGTA   | Real time qPCR | Litman et al., Nat Struct Mol Biol 2008 |
| Fgfr2 RT-qPCR For         | CAAGGAGCTCTTGTCTTCAGG     | Real time qPCR | Yamaji et al., Cell Stem Cell 2013      |
| Fgfr2 RT-qPCR Rev         | TAACACTGCCGTTTATGTGTGG    | Real time qPCR | Yamaji et al., Cell Stem Cell 2013      |
| Fgfr1 RT-qPCR For         | CTACCAACCTGTCCCCAGT       | Real time qPCR | Yamaji et al., Cell Stem Cell 2013      |
| Fgfr1 RT-qPCR Rev         | CACAGGAAGGCCCTCAGTCAG     | Real time qPCR | Yamaji et al., Cell Stem Cell 2013      |
| Nanog RT-qPCR For         | AAGCAGAAGATGCGGACTGT      | Real time qPCR | Dawlaty et al. Developmental Cell 2014  |
| Nanog RT-qPCR Rev         | ATCTGCTGGGAGGCTGAGGTA     | Real time qPCR | Dawlaty et al. Developmental Cell 2014  |
| Pou5f1 RT-qPCR For        | ACATCGCCAATCAGCTTGG       | Real time qPCR | Dawlaty et al. Developmental Cell 2014  |
| Pou5f1 RT-qPCR Rev        | AGAACCATACTCGAACCCATCC    | Real time qPCR | Dawlaty et al. Developmental Cell 2014  |
| Sox2 RT-qPCR For          | GCGGAGTGGAACTTTTGTC       | Real time qPCR | Dawlaty et al. Developmental Cell 2014  |
| Sox2 RT-qPCR Rev          | CGGGAAGCGTGTACTTATCCTT    | Real time qPCR | Dawlaty et al. Developmental Cell 2014  |
| Prdm14 RT-qPCR For        | ACAGCCAAGCAATTTGCACTAC    | Real time qPCR | Yamaji et al., Cell Stem Cell 2013      |
| Prdm14 RT-qPCR Rev        | TTACCTGGCATTITTCATTGCTC   | Real time qPCR | Yamaji et al., Cell Stem Cell 2013      |
| Cdx2 RT-qPCR For          | CGAGCCCTTGAGTCTGTGA       | Real time qPCR | Gu et al, Stem Cell Reports 2018        |
| Cdx2 RT-qPCR Rev          | AACCCAGGGACAGAACC         | Real time qPCR | Gu et al, Stem Cell Reports 2018        |
| Gata4 RT-qPCR For         | CAGAAGGCAGAGAGTGTGC       | Real time qPCR | This paper                              |
| Gata4 RT-qPCR Rev         | AGTGGCATTGCTGGAGTTAC      | Real time qPCR | This paper                              |
| Gata6 RT-qPCR For         | GAGCTGGTCTACCAAGAGG       | Real time qPCR | Ito et al., Nature 2011                 |
| Gata6 RT-qPCR Rev         | TGCAAAGCCCATCTCTTCT       | Real time qPCR | Ito et al., Nature 2011                 |
| Pax6 RT-qPCR For          | AACAACCTGCCTATGCAACC      | Real time qPCR | Dawlaty et al. Cell Stem Cell 2011      |
| Pax6 RT-qPCR Rev          | ACTTGGACGGGAACGTGACAC     | Real time qPCR | Dawlaty et al. Cell Stem Cell 2011      |
| Gapdh RT-qPCR For         | GTGTTCTACCCCAATGTGT       | Real time qPCR | Dawlaty et al. Cell Stem Cell 2011      |
| Gapdh RT-qPCR Rev         | ATTGTCATACCAGGAAATGAGCTT  | Real time qPCR | Dawlaty et al. Cell Stem Cell 2011      |
| Tet1 Enhancer 1 For       | TCAGAAAAGATCTGCCCTGCCG    | ChIP-qPCR      | This paper                              |
| Tet1 Enhancer 1 Rev       | TGGGGAAGGGTAGTCTCCAA      | ChIP-qPCR      | This paper                              |
| Tet1 Enhancer 2 For       | AGGAATGACTGGTCTGCACC      | ChIP-qPCR      | This paper                              |
| Tet1 Enhancer 2 Rev       | GAGACGCCTCTTGTGAGGT       | ChIP-qPCR      | This paper                              |
| Tet1 Promoter 1 For       | CCTGGTCTACAGGAGACGCTA     | ChIP-qPCR      | This paper                              |
| Tet1 Promoter 1 Rev       | AAGGGTGACCTTGAGCTTCC      | ChIP-qPCR      | This paper                              |
| Tet1 Promoter 2 For       | GGCTGGCTACTGTCCCTTGAT     | ChIP-qPCR      | This paper                              |
| Tet1 Promoter 2 Rev       | CGTCTTGGCAGGTGAATCC       | ChIP-qPCR      | This paper                              |
| Tet2 Enhancer 1 For       | GTGAGTTTGCATCGGCCTAAC     | ChIP-qPCR      | This paper                              |
| Tet2 Enhancer 1 Rev       | TGCAAACCACTGAGGGGAAG      | ChIP-qPCR      | This paper                              |
| Sox2 Enhancer 1 For       | CTGGTGGTCTCAAACCTCTG      | ChIP-qPCR      | This paper                              |
| Sox2 Enhancer 1 Rev       | GGTTCCTCCTCTCCTAAT        | ChIP-qPCR      | This paper                              |
| Sox2 Enhancer 2 For       | AAGTAGGCAGGTTCCTCCTC      | ChIP-qPCR      | This paper                              |
| Sox2 Enhancer 2 Rev       | ATGTGTGAGCAAGAACTGTGC     | ChIP-qPCR      | This paper                              |
| Nanog Enhancer 1 For      | CGTCCCTGGATAGCGATGA       | ChIP-qPCR      | This paper                              |
| Nanog Enhancer 1 Rev      | CTTGGGAGTGGCCTTTGGT       | ChIP-qPCR      | This paper                              |
| Nanog Enhancer 2 For      | CCGGCTTAGAGCTTGAACCA      | ChIP-qPCR      | This paper                              |
| Nanog Enhancer 2 Rev      | TCCCAAGGGCGACGTAATTT      | ChIP-qPCR      | This paper                              |
| Nanog Promoter 1 For      | GTGGACCCAGAGGCAAGTTT      | ChIP-qPCR      | This paper                              |
| Nanog Promoter 1 Rev      | TCCCAAGGGCGACGTAATTT      | ChIP-qPCR      | This paper                              |
| Oct4 Promoter 1 For       | TGAACTGTGGTGGAGAGTGC      | ChIP-qPCR      | This paper                              |
| Oct4 Promoter 1 Rev       | GTTATGCATCTGCCCTCTGC      | ChIP-qPCR      | This paper                              |
| Oct4 Promoter 2 For       | GTTGGGAGCAGGAAGTTGT       | ChIP-qPCR      | This paper                              |
| Oct4 Promoter 2 Rev       | AATGGCCTTGGCTGGACAAT      | ChIP-qPCR      | This paper                              |
| ActB ChIP-qPCR For        | GTGCTGAAGTTCCAGAGAACC     | ChIP-qPCR      | This paper                              |
| ActB ChIP-qPCR Rev        | GTTTAGACACAGGCATGTGCAG    | ChIP-qPCR      | This paper                              |
| CYR61ChIP-qPCR-For        | CATCGTTACAGCACGCTCT       | ChIP-qPCR      | Wu et al., 2011                         |
| CYR61ChIP-qPCR-Rev        | CAAGGACGCATTCACAGAT       | ChIP-qPCR      | Wu et al., 2011                         |

**Table S2 (Related to STAR Methods): Genomic location of Rinf peaks and ChIPqPCR primers used**

| Gene Regulatory Region | chromosome | Peak Start | Peak Center | Peak End  | ChIP-qPCR Forward Primer | ChIP-qPCR Reverse Primer | Product region        | Product Size (bp) |
|------------------------|------------|------------|-------------|-----------|--------------------------|--------------------------|-----------------------|-------------------|
| Tet1 Enhancer 1 (E1)   | chr10      | 62892803   | 62892980    | 62893200  | TCAGAAAAGATCTGCCTGCCG    | TGGGGAAGGGTAGTCTCCAA     | 62892850 - 62892999   | 150               |
| Tet1 Enhancer 2 (E2)   | chr10      | 62895488   | 62895684    | 62895876  | AGGAATGACTGGTCTGCACC     | GAGACGCCTCTTGTGAGGT      | 62895639 - 62895733   | 95                |
| Tet1 Promoter 1 (P1)   | chr10      | 62896848   | 62897018    | 62897217  | CCTGGTCTACAGGAGACGCTA    | AAGGGTGACCTTGAGCTTCC     | 62895639 - 62895733   | 110               |
| Tet1 Promoter 2 (P2)   | chr10      | 62897931   | 62898324    | 62898483  | GGCTGGCTACTGTCTTGAT      | CGTCCTTGGCAGGTGAATCC     | 62898304 - 62898394   | 91                |
| Tet2 Enhancer (E1)     | chr3       | 133532697  | 133532785   | 133532908 | GTGAGTTTGCATCGGCCTAAC    | TGCAAACCACTGAGGGGAAG     | 133532749 - 133532818 | 70                |
| Nanog Enhancer 1 (E1)  | chr6       | 122662791  | 122663012   | 122663176 | CGCTCCCTGGATAGCGATGA     | CTTGGGAGTGGCACTTTGGT     | 122662966 - 122663050 | 85                |
| Nanog Enhancer 2 (E2)  | chr6       | 122702474  | 122702941   | 122703231 | GTGGACCCAGAGGCAAGTTT     | TCCCAAGGGCGACGTAATTT     | 122702936 - 122703121 | 186               |
| Nanog Promoter (P1)    | chr6       | 122707333  | 122707483   | 122707579 | ACAATGTCCATGGTGGACCC     | ACCCTACCCACCCCTATTCC     | 122707422 - 122707527 | 106               |
| Oct4 Enhancer (P1)     | chr17      | 35503923   | 35504047    | 35504238  | TGAACTGTGGTGGAGAGTGC     | GTTATGCATCTGCCGCTGCG     | 35503925 - 35504059   | 135               |
| Oct4 Promoter (P2)     | chr17      | 35504766   | 35505096    | 35505356  | GTTGGGGAGCAGGAAGTTGT     | AATGGCCTTGGCTGGACAAT     | 35505059 - 35505175   | 117               |
| Sox2 Enhancer 1 (E1)   | chr3       | 34646228   | 34646394    | 34646529  | CTGGTGGTCGTCAAACTCTG     | GGTTCCCTCCTCTCCTAAT      | 34646276 - 34646407   | 132               |
| Sox2 Enhancer 2 (E2)   | chr3       | 34653945   | 34654029    | 34654245  | AAGCTAGGCAGGTTCCCTC      | ATGTGTGAGCAAGAAGTGTG     | 34653984 - 34654113   | 130               |
